# Supplementary material
Source: publisher figshare collection journal article supplement (https://karger.figshare.com/ndownloader/files/26663315)
Supplement: Supplementary file 1 [file 26663315]

Table S1. The primers for QRT-PCR analyses.

| **Gene** | **Forward primer (5'-3')** | **Reverse primer (5'-3')** |
| --- | --- | --- |
| Flaggrin | ATGTCCGCTCTCCTGGAAAG | TGGATTCTTCAAGACTGCCTGTA |
| Loricrin | AGTAAGGTCACCGGGTTGCA | GCGACTCAATGGCTTCTTCTG |
| Involucrin | ATGTCCCATCAACACACACTG | TGGAGTTGGTTGCTTTGCTTG |
| HMGCoA | AGCCAGTGGTCCCACAAATG | CCAGGATTGTCTTTGCATGCT |
| STPLC1 | GGGTTTAAAAGTGGTGGGAGAGT | TACCGTGCCTGAGTCAATGC |
| FAS | GGTGCTTGCTGGCTCACA | TGGCATGGTTGACAGCAAAA |
| PCNA | TTT GCA CGT ATA TGC CGA GAC | GGTGAACAGGCTCATTCATCTCT |

**Supplemental Figure 1. Clinical Pictures of Mice following 9-day Treatments.**

6-8 week old female C57BL/6J mice were topically treated with GC (0.05% clobetasol) or GC plus Heparinoid® cream, as described in Materials and Methods. Suppl Fig 1a. Normal mice; Suppl Fig 1b. Heparinoid® cream-treated mice; Suppl Fig 1c. GC-treated mice; Suppl Fig 1d. Mice treated with both Heparinoid® cream GC.
